# Supplementary material
Source: MDPI journal article supplement (https://www.mdpi.com/2410-3888/8/8/416)
Supplement: s1 [file s1]

Archive with 3 entries (3 files):
- Manu script Supplementary Tables file.pdf
- Manuscript Supplementary Figure file.pdf
- Table S3- The qPCR expression dynamics of immune challanged shrimps.xlsx
