# Supplementary material
Source: MDPI journal article supplement (https://www.mdpi.com/2410-3888/8/8/416)
Supplement: s1 [file s1]

## Supplementary tables

**Table S1.** Primers used in this study.

| Primers               | Sequence (5'-3')                 | Amplicon size | Reference                                                                                         |
|-----------------------|----------------------------------|---------------|---------------------------------------------------------------------------------------------------|
| <i>Lv</i> SOCS6-F1    | CTTTGGCCATGTCTTGCGGTGAA          | 1465 bp       | Present study                                                                                     |
| <i>Lv</i> SOCS6-R1    | TGCAACCTCACTTCTTCAGGGTCA         |               |                                                                                                   |
| <i>Lv</i> SOCS7-F1    | AACTTCCAGACTTGTGGGTGAGG          | 2994 bp       | Present study                                                                                     |
| <i>Lv</i> SOCS7-R1    | CCTAGCATAGGTTACAGCACTCCAT<br>TAC |               |                                                                                                   |
| <i>Lv</i> SOCS6-qRT-F | TATTCCCGAGCCCGTG                 | 126 bp        | Present study                                                                                     |
| <i>Lv</i> SOCS6-qRT-R | CACGAGTGTACTGTCTGA               |               |                                                                                                   |
| <i>Lv</i> SOCS7-qRT-F | AGTGCCAGTAGATGTAGTGAAG           | 154 bp        | Present study                                                                                     |
| <i>Lv</i> SOCS7qRT-R  | ACTACTCACTCTCTTGGA               |               |                                                                                                   |
| <i>Lv</i> STAT-qRT-F  | GCTGCCAACTCTCAATCCCACA           | 115 bp        | Present study                                                                                     |
| <i>Lv</i> STAT-qRT-R  | TGCTGTGAAGCGTGTGTTTGTCT          |               |                                                                                                   |
| <i>Lv</i> -EF1A-F     | TCGCCGAACTGCTGACCAAGA            | 124 bp        | <a href="https://doi.org/10.3389/fimmu.2021.634152">https://doi.org/10.3389/fimmu.2021.634152</a> |
| <i>Lv</i> -EF1A-R     | CCGGCTTCCAGTTCCTTACC             |               |                                                                                                   |

**Table S2.** The sequence homologies of *LvSOCS6/ LvSOCS7* in relation to other SOCS6/SOCS7 proteins.

| Species                    | Identity with <i>LvSOCS6</i> (%) |
|----------------------------|----------------------------------|
| <i>Eriocheir sinensis</i>  | 69.3                             |
| <i>Oncorhynchus mykiss</i> | 51.0                             |
| <i>Mus musculus</i>        | 48.0                             |
| <i>Homo sapiens</i>        | 47.4                             |
| <i>Danio rerio</i>         | 46.0                             |
| <i>Xenopus tropicalis</i>  | 45.5                             |
| <i>Gallus gallus</i>       | 43.9                             |
| <i>Tribolium castaneum</i> | 33.5                             |

  

| Species                      | Identity with <i>LvSOCS7</i> (%) |
|------------------------------|----------------------------------|
| <i>Chionoecetes opilio</i>   | 55.2                             |
| <i>Danio rerio</i>           | 26.8                             |
| <i>Gallus gallus</i>         | 22.8                             |
| <i>Xenopus tropicalis</i>    | 22.5                             |
| <i>Zeugodacus cucurbitae</i> | 20.1                             |
| <i>Ceratitis capitata</i>    | 19.0                             |
| <i>Oncorhynchus mykiss</i>   | 18.0                             |
| <i>Homo sapiens</i>          | 15.7                             |
| <i>Mus musculus</i>          | 15.4                             |
