# Supplementary material
Source: MDPI journal article supplement (https://www.mdpi.com/2410-3888/8/8/416)
Supplement: s1 [file s1 › Manuscript Supplementary Figure file.pdf]

## Supplementary materials

# Molecular cloning and gene expression of Type I suppressor of cytokine signaling 6 and 7 (SOCS6 and SOCS7) in whiteleg shrimps (*Litopenaeus vannamei*)

Gunasekara CWR, Madhuranga WSP, Jiye Lee and Chan-Hee Kim \*

Division of Fisheries Life Science, Pukyong National University, Busan 48513, Republic of Korea

\* Correspondence: chkim@pknu.ac.kr; Tel.: +82-51-629-5917

```

ATGATGAAAAAGGTG AGCATAGCGCTGAGC CGGTCGCCTCGCTAT GGGAGTAGCAGGTGC 60
M M K K V S I A L S R S P R Y G S S R C 20
GGGAGTGCCAACGGC GAGGTGGTCTGGGG TCGTCCTCGGCCACC ACGACCCTCGCCACC 120
G S A N G E V V L G S S S A T T T L A T 40
ACCACCTCTCGACC TCTTCCTCTTCTGCC TCTTCCTCTCGCAG CACGACGCCGACAAG 180
T T S S T S S S S A S S S S Q H D A D K 60
AAGAAAAAGTCGAGA GCCGGCGGGATCCTG CAGACTTTGAGGAAG AAGATCAGCGACAAG 240
K K K S R A G G I L Q T L R K K I S D K 80
CTGGACACTCTCCAG CAGGGCAGCTCGAGT TCGACCTCGTCTCG CGGGCCGCCCCAGG 300
L D T L Q Q G S S S S T S S R A A P R 100
AAGAGCAAAAGCGTC GAGGGCTCTCCAAC AGCTTCGGCGGGGAC TCGTTCTCAGATCG 360
K S K S V E G L S N S F G G D S F S Q S 120
GTGAGTGAGGAGTCC TCTAGTGATGGCTC AACGCCTCTGGGGGC GGGGGAAGTGGGGGC 420
V S E E S S S D G L N A S G G G G S G G 140
ACACACAAAAGCAAA CATAGCAAGCGTGCC ATCAGGCCTATCAAC ACTCCCATCAACACG 480
T H K S K H S K R A I R P I N T P I N T 160
CCCATTCGACGCCAA AACTCATCATCATCAT GTGTTGGCAGCAAT GGCGACGTGGACACA 540
P I A R Q N S S S H V L A A N G D V D T 180
CAAGGGGGCAAGGTC GAAGSTGGCCAGGGC ATCACGGCAGCAGTG TCTCTTTATAGCAAG 600
Q G G K V E G G Q G I T A A V S L Y S K 200
CCTAAAGGTTACATA TCAGATGCATCAGTG CAGAAACAGCAGCAG CAGGTGTTGACTGAA 660
P K G Y I S D A S V Q K Q Q Q Q V L T E 220
GGCCAGGTGCCCAGG GCCAATGGCCGGGAT AAAGTGCCGACAGTG ACAGTGATAGTGTT 720
G Q V P R A N G R D K V P T V T V D S V 240
GGGGGGGTCGAGGAG TGTGTGTACACAGT GCCAATGTCCCTAGA AGGGGCCTTGGTGTT 780
G G V E E C V Y T S A N V P R R G L G V 260
GCCAAGAATGCTGAC CACAGTGCCATATCG GAGACGTCATACCA CAGCCCAACCGGACG 840
A K N A D H S A I S E T S S P Q P N R T 280
TGTGGATGCGAGCTG TGGGACCTTCAGGAC ATGAGTCTAGATGCC AGTAAGAGGAGCCTG 900
C G C E L W D L Q D M S L D A S K R S L 300
GCAGAAGAGCTTTTC CATCTGGCAAAGTAC GGATGGTACTGGGGA CCAATCACACGTGCC 960
A E E L F H L A K Y G W Y W G P I T R A 320
GAGGCTGAGGAAAG CTCTTTGACCAGCCT GATGGAGCTTTCTCTC GTTCGAGATTCATCT 1020
E A E E K L F D Q P D G A F L V R D S S 340
GACGACAGTACCTG CTGAGCCTAAGCTTC CGATCGTTCAACAGG ACGCTACACACACGC 1080
D D K Y L L S L S F R S F N R T L H T R 360
ATTGAACACAGCAAT GGCTGGTTCAGTTTT TACCCGCATCCAGAA CACGAGGGCCACACC 1140
I E H S N G W F S F Y P H P E H E G H T 380
AGCCTTGTGGGGGTG ATTGACCACAGCATG AGCCACTCTGAGTCA GGTGTCTTCTGCTAT 1200
S L V G L I D H S M S H S E S G V F C Y 400
TCCCGAGCCGTTGGG CCTGGGTCTCCATCC TTCCCTGTGAGGCTC ACCAAGCCAGTCTCC 1260
S R A R G P G S P S F P V R L T K P V S 420
AGTTTACTCAGGTG CGATCCCTACAATAC CTTTGCCGATTGTG ATCAGACAGTACACT 1320
R F T Q V R S L Q Y L C R F V I R Q Y T 440
CGTGTGGACACATA CAGGCTTGGCCGCTG CCAACCAGGATAAAG GGATATCTTGAAGAA 1380
R V D H I Q A L P L P T R I K G Y L E E 460
GGTCACTAC TGA 1392
G H Y * 463

```

**Figure S1:** The *Lv*SOCS6 protein coding nucleotide region (top) and its deduced amino acid sequence (bottom). The start (ATG) and stop (TGA) codons are presented in red color. In the amino acid sequence, SH2 and SOCS-box domain positions are shown in red and blue color.

**ATG**CCAGAGAGGGT TGTGTGTGGATTGAT AAGTTTGCCTCATTG TTTGTGAAACAAGTG 60  
 M A R E G C V W I D K F A S L F V K Q V 20  
 CTTGAGGAGGCACTG ACTGTGAGTTGTTCA ATAGGATGGTCCATC AAATGTTCTGGCCAG 120  
 L E E A L T V S C S I G W S I K C S G Q 40  
 TGTGAGCGGGAACAG TGTCCGGAGGAGTAC CAGAGGAAGGAGAGC AACTGGTGGGCTGTA 180  
 C Q R E Q C R E E Y Q R K E S N W W A V 60  
 GGTGGGAGCAAAGGG AGTCGCAAGTCAAGC ATTCCTCCTCCTTGA CTGTCTGTGGGAGC 240  
 G G S K G S S R K S S I P L L G L S C G S 80  
 CCAGGCTTGTGCTGG ACGCCAGAGCTACCC TACAGCCCCTCGCAC CGGCCGCACTCCCGA 300  
 P G L C W T P E L P Y S P S H R P H S R 100  
 TCTTCCTTGGGCTCA AGTCTCTCCTTCTCC CATGACTCATTTGGTC AGCTCTGGCCCTCGC 360  
 S S L G S S L S F S H D S L V S S G P R 120  
 ATGGATGACTCCAC CTCATCACCAGCGCT GTGTACATGATGCC TTGCTCTTTCTACT 420  
 M D D S H L I T G A V S H D A L L F P T 140  
 TCCAAACCAACCAC AGCGATGTAAGTGAC ATTTACAACGTGCCG CTAGATGGAGATATC 480  
 S K T N H S D V S D I Y N V P L D G D I 160  
 TATGCAGTGCCAGTA GATGTAGTGAAGCCG AAGGAAGGGCAGATA CTACACCCAAAGGCC 540  
 Y A V P V D V V K P K E G Q I L H P K A 180  
 ATTATGCACAGCCC AAGAAGAGACATCAC CGGAGACATGGTAAG AACAGTGCCAGTGCC 600  
 I M H L P K T P H R R H G K N S A S A 200  
 AGTGTGCTGAATGAT GCCAGTTCCAAGAGA GTGAGTAGTTCCGAT CACGTTAGCAGTAGC 660  
 S V L N D A S S K R V S S S D H V S S S 220  
 CGGCAGCTCAAGGAG AGTAGTGTGACGAGG AGCAGACAGCACTCA GGTCAATCTGTGCA 720  
 R Q L K E S A G T V T R S R Q H S G Q S V A 240  
 TCAGTCAGTGGTGGT GAATTGTTAAGGGTC AGCAAGCGTCACAGT GTCCCCAGTAACATT 780  
 S V S G G E L L R V S K R H S V P S N I 260  
 GGTTGTGCCCCTCAGC ATGACTCCAAGCAT GGCCCCAGCAAAGAA AATCATGAACCCATT 840  
 G C A L P K T P K H G P S K E N H E P I 280  
 CACATGACGTTAGAG GAAGTTAGAAAGTCC TTCCACGAGTCTGAT GACACAATAAACTGT 900  
 H M T L E E V R K S F H E S D D T I N C 300  
 AACAAGACTCATAGA GTTCAACAAGAGAGA AAAGTAGTCTATGAA CAATCTAAATATGC 960  
 N K T H R K T P E R K V A H E Q S K I C 320  
 AGAATAATTCCATTT ACTTCAATGAAGTCA TGCAAAAGAAAAGAC AGCTCTGAAGGGCGT 1020  
 R I I P F T S M K S C K R K D S S E G R 340  
 CTTGAGGACAACAGA AAGAAAGGCAAAAGT ATATCTAGTAATATC CGTAACACCCTTATT 1080  
 L E D N R K K G T K I S S N I R N T L I 360  
 ACAATATTTGGTCTG AAAAAGGGAACCAA TCTAGTAGTTCAAGA TTGAAAAGCGGAAGC 1140  
 T I F G L K K G T K S S S S R L K S G S 380  
 TGTGTGGACGCTGCA TCTCAGGGATTTTCA GAAATCGCCGGCAAT GGGACCACAACCCGT 1200  
 C V D A A S Q G F S E I A G N G T T T L 400  
 GCTGGCTCCCCGCC TCAGGACCAAAACCC AACAATACAGCCAAC CATAACAACCCGTT 1260  
 A G S P A S G P K P N N T A N H T T T V 420  
 AGCAAGAACCACCAC AACCAGCAGAACCAT CACAGCAACCACCGC CACTCCAATGGCATT 1320  
 S K N H H N Q Q N H H S N H R H S N G I 440  
 AACACTGGATTGCTG TCATGCCTGGGAAAC CACAGAGCAGAGGCA GATGACCTACCTGCG 1380  
 N T G L L S C L G N H R A E A D D L P A 460  
 ACTGTAGCCCCAGCA CCTCAGCAGAACAGC GCTCCCCATCACGA TCACCAGCTATTGTC 1440  
 T V A P A P Q Q N S A P P S R S P A I V 480  
 ACCAACCGTGCACTG CCTCCTTTGCCCTTG CCCAGTACCGGGGAG GAGGAAGATGCCAAC 1500  
 T N R A L P P L P L P S T G E E E D A N 500  
 AGTAAGTCGCAGAC GAGTCTGGGAGTGAG CGCAGAGAAGAGGAA GGCTGCGACTTTGCC 1560  
 S K S Q T E S G S E R R E E E G C D F **A** 520  
 TCCATCATTGAAAA GTCAAAGATTGTGGG TGGTATTGGGGTCCA ATCAGCGGGGAGGCA 1620  
 S I I E K V K D C G W Y W G P I S G E A 540  
 GCCGAGAAGGTGCTG GCCAACGAACCCGAT GGGTCCTTCATTGTG AGGGATTGCTCTGAC 1680  
 A E K V L A N E P D G S F I V R D S S D 560

```

CACCCTACATCTTC TCCCTTACCTTCAAG CTCAATGGCTTCATT CGGCACGTCAGGATT 1740
H H Y I F S L T F K L N G F I R H V R I 580
GAACATGATCAAGGA AATTTCAGTTTGGT GGGTTTACCAAGTTC AAAAGCCAGACCATA 1800
E H D Q G N F S F G G F T K F K S Q T I 600
GTCGAGTTCATGAA AATGCTGTGGAACAT TCTCGTAGCGGCCGA TATTTGTTTTCTG 1860
V E F I E N A V E H S R S G R Y L F F L 620
CACCGTCGCCCTGTC CTGGGACCCATGAGG GTTCAGCTTCTCCAC CCAGTGTCTCGCTTT 1920
H R R P V L G P M R V Q L L H P V S R F 640
AAGCACATTGAGAGT CTTCAGCATTGTGT CGATTGTTATTGTG AAGCATGTCCGCCGT 1980
K H I Q S L Q H L C R F V I V K H V R R 660
GACCTGATTGGTGAG CTGCCACTACCTCAG CGACTGAAAGACTAT TTGTGCTCCCCGCAT 2040
D L I G E L P L P Q R L K D Y L C S P H 680
TACTATCCGAAATG GTTGAGCAATGCATG GCAGCCGCTGCGGCC GCTGCAGCTTCTGAT 2100
Y Y S E M V E Q C M A A A A A A A A A S D 700
AATGAAGACAGTGT TCTTCAGGAGCCACA GTCGAAGGGCTTAGT GTTCCTAGTCAGGTG 2160
N E D S A S S G A T V E G L S V P S Q V 720
CTTACCCCTCGCTA GGAGACCTACAAGAC AACCTTCTGCACCA CCCACCCTTTTGCCA 2220
L H P S L G D L Q D N L P A P P T L L P 740
GGCTTCCCCGGTGA CCTCAGCCTGTGATG GACCGTGCCTCCAG ACCTCCAGGCGGCT 2280
G F P G V P Q P V M D R A S Q T S Q A A 760
TCCCCCAACCCACCA CCGTCACAGGAGGAC GACCTGAACCTCCAA GCTCACCAGGATTTA 2340
S P N P P P S Q E D D L N L Q A H Q D L 780
GATAATTCCAATCTA CAAGAGACCAGCCCA AACCAACAACATCC ACTGTACTTCAACCC 2400
D N S N L Q E T S P N H N T S T V L Q P 800
CTAATAGACCCGAC CATCATGTGCAGT ATAACACAGCCTTTG CCAGAGCCCAACCAC 2460
L I D P D H H V S S I T Q P L P E P N H 820
CTCACCATGAACCCC CCAGCCAGTGTAAC GACGACTCCACCATC AGTCACTCCCCTACA 2520
L T M N P P A S V N D D S T I S H S P T 840
TGTTGCTCACCAGCA CACATGGAGCGTGAT AATTACCGTGTGTG CCACAGGTGACCCTA 2580
C C S P A H M E R D N Y R V C P Q V T L 860
ACCAGCCAGGCTCAT GCTGCCAGTGCCTCA CCTGCCCTACAGGGT AACCTTGCCTTCGCC 2640
T S Q A H A A S A S P A L Q G N L A F A 880
CACCAACACACGACC AGTGCCAGTGGGCCT CTCTCACTCGTCTCC TCAAAGAGTGACGCG 2700
H Q H T T S A S G P L S L V S S K S D A 900
CAGGACGATAGAAGT TTCCCTATTGACAGA GCACCCATGTTCACT GACAGTGCTCGCAGT 2760
Q D D R S F P I D R A P M F T D S A R S 920
GATGCAGGCAGAATA AAAGCGAATGCAATG GGCTCTGGAGACTTT GTTAGAATCAACCCA 2820
D A G R I K A N A M G S G D F V R I N P 940
TGTCGTGGTCTGGAT GACCATGTTTTTGAA GATTAGGAGGTGTC TGA 2868
C R G L D D H V F E D L G G V * 955

```

**Figure S2:** The *LvSOCS7* protein coding nucleotide region (top) and its deduced amino acid sequence (bottom). The start (ATG) and stop (TGA) codons are presented in red color. In the amino acid sequence, SH2 and SOCS-box domain positions are shown in red and blue color.

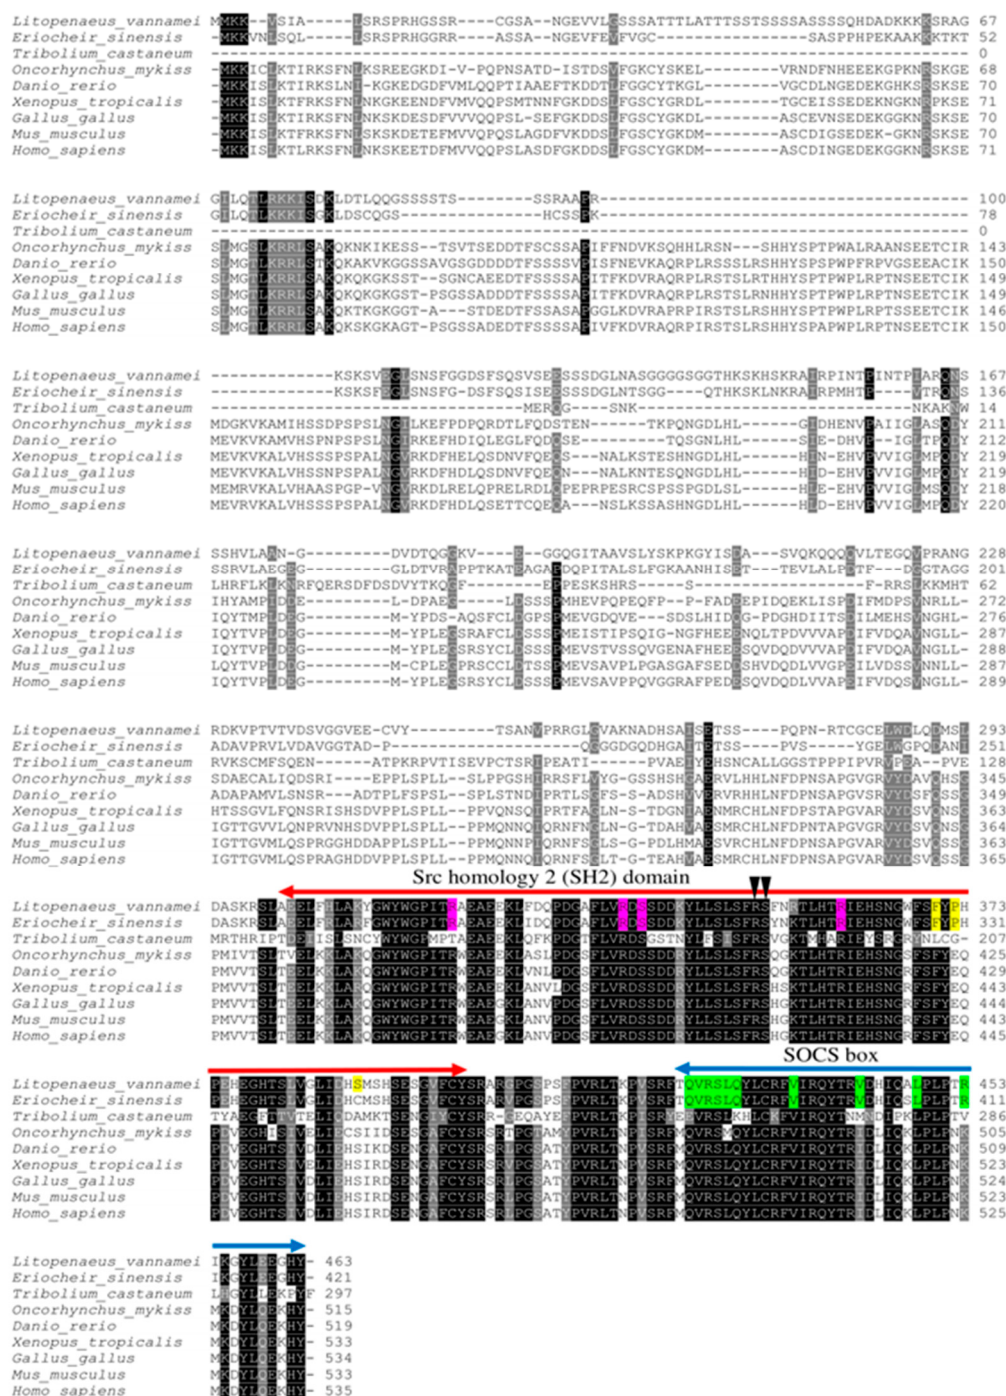

**Figure S3:** Multiple sequence alignment (MSA) of *LvSOCS6* and its counterparts. Strongly conserved and similar residues are highlighted by black and gray shading and the conserved phosphotyrosine recognition site (pY) of *LvSOCS6* is indicated with (▼). The regions of the phosphotyrosine binding pocket, hydrophobic binding pocket, and putative elongin B/C binding pockets are indicated in purple, yellow, and green color respectively. The species and the GenBank accession numbers used for the MSA were as follows: *SOCS6* from *H. sapiens* (NP\_004223.2), *M. musculus* (NP\_061291.2), *G. gallus* (NP\_001120784.1), *X. tropicalis* (NP\_001096240.1), *D. rerio* (XP\_687041.2), *O. mykiss* (NP\_001182102.1), *E. sinensis* (ATW63847.1) and *T. castaneum* (XP\_008190646).

|                             |                                                                                   |     |
|-----------------------------|-----------------------------------------------------------------------------------|-----|
| <i>Litopenaeus vannamei</i> | -----                                                                             | 0   |
| <i>Chionoecetes opilio</i>  | MIVVLRQRQVVMATAAGLARQRWVRCAAEEVKMEGPDSPQPQISSPLPPPIIAEEAPHQSPSPPTSPSTPLQSLPHTPLR  | 80  |
| <i>Zeugodacus cucurbita</i> | -----MLEMDTVIRDEDSNY-----                                                         | 15  |
| <i>Ceratititis capitata</i> | -----MLEMDTTSKDEDSNC-----                                                         | 15  |
| <i>Oncorhynchus mykiss</i>  | -----                                                                             | 0   |
| <i>Danio rerio</i>          | -----                                                                             | 0   |
| <i>Xenopus tropicalis</i>   | -----                                                                             | 0   |
| <i>Gallus gallus</i>        | -----                                                                             | 0   |
| <i>Mus musculus</i>         | -----                                                                             | 0   |
| <i>Homo sapiens</i>         | -----                                                                             | 0   |
| <i>Litopenaeus vannamei</i> | -----                                                                             | 0   |
| <i>Chionoecetes opilio</i>  | HSPLPHTITPHTPLPHTPLTPHSPLTPLTSQSTLASEASVDGSAHSLDMLHNSCSSFETHALRRRAGSSVSSGTSE      | 160 |
| <i>Zeugodacus cucurbita</i> | -----NMATS-ASNSSAVSTILQMCQSTCTDY-----                                             | 42  |
| <i>Ceratititis capitata</i> | -----NFSTP-SFANSSAVSSILQMCQSSCSY-----                                             | 42  |
| <i>Oncorhynchus mykiss</i>  | -----                                                                             | 0   |
| <i>Danio rerio</i>          | -----                                                                             | 0   |
| <i>Xenopus tropicalis</i>   | -----                                                                             | 0   |
| <i>Gallus gallus</i>        | -----MQRAELRD--GEAA-----                                                          | 12  |
| <i>Mus musculus</i>         | -----                                                                             | 0   |
| <i>Homo sapiens</i>         | -----                                                                             | 0   |
| <i>Litopenaeus vannamei</i> | -----                                                                             | 0   |
| <i>Chionoecetes opilio</i>  | GWLGSLDGDGPAGLEVLPPELWPHSESPTAPGHSLPPSHNSPASPKHSPTPSHRSPTLSCHSPVTMHHSPTTTTATTTTTT | 240 |
| <i>Zeugodacus cucurbita</i> | --VGVLPPPHIDMVSVNSVELNAQTSLSDDSGVPLTTNSSISSG-----DSYRMGLCKHEIDIVESDGE-----        | 104 |
| <i>Ceratititis capitata</i> | --VGVLPPP-IDMASVNSVELNAQTSLSDDSGVPLTTNSSISSG-----DSYRMGLCKHELEIVESDGE-----        | 103 |
| <i>Oncorhynchus mykiss</i>  | -----                                                                             | 0   |
| <i>Danio rerio</i>          | -----                                                                             | 0   |
| <i>Xenopus tropicalis</i>   | -----                                                                             | 0   |
| <i>Gallus gallus</i>        | -----AAASYRVLSRLLGYGAGPEAGAA-----                                                 | 35  |
| <i>Mus musculus</i>         | -----                                                                             | 0   |
| <i>Homo sapiens</i>         | -----                                                                             | 0   |
| <i>Litopenaeus vannamei</i> | -----                                                                             | 0   |
| <i>Chionoecetes opilio</i>  | TATTQNHLPSPSEAAISKAIIVPGDSQDPERHSSSPRDNPKEAFSTVIPIHPSALSPTSPLRPG--VVQTGKKRQNFMI   | 317 |
| <i>Zeugodacus cucurbita</i> | --VSQFDSLDCSEAGMS-----AENFNTLK--KGPLAPIDPPLEFQDSPNITIGRCIMQKLR                    | 158 |
| <i>Ceratititis capitata</i> | --VSQFDSLDCSEAGMS-----AENFNTLK--KGPLAPIDPPLEFQDSPNITMGRCIKQKLR                    | 157 |
| <i>Oncorhynchus mykiss</i>  | -----MV                                                                           | 2   |
| <i>Danio rerio</i>          | -----                                                                             | 0   |
| <i>Xenopus tropicalis</i>   | -----MV                                                                           | 2   |
| <i>Gallus gallus</i>        | -----GGPGSGAAVAGPPGPGGAR--L--PLPVPA--PGGAP--RPPQLMV                               | 74  |
| <i>Mus musculus</i>         | -----MV                                                                           | 2   |
| <i>Homo sapiens</i>         | -----MV                                                                           | 2   |
| <i>Litopenaeus vannamei</i> | -----                                                                             | 0   |
| <i>Chionoecetes opilio</i>  | TVNSAP-----ITESQCGHVFTTEYGC-----SGDEGYENRFCFTKDHLLQENCGLNGVLRKTKTAH               | 375 |
| <i>Zeugodacus cucurbita</i> | RLSSSHSSLEHSSKDEHNENSINGDRIFCKDSDVSSQYLAKSHKEVYLKPKIYSSDSILSNKAEN-----            | 226 |
| <i>Ceratititis capitata</i> | RLSSSHSSLEYSKESEYNENNINHGEKTCCKEADMEITTYQLGKPKELYLMKKPIYSSDSILTNKTEN-----         | 225 |
| <i>Oncorhynchus mykiss</i>  | FQNLRL--TSDGVFECL--QPPPGFQVSEV--DKQEASSVCVMMT-----                                | 42  |
| <i>Danio rerio</i>          | -----                                                                             | 0   |
| <i>Xenopus tropicalis</i>   | FRNMLR--GEEEGGEAAP--EP--                                                          | 20  |
| <i>Gallus gallus</i>        | FRNAEE--GRPGEEEA--GG--                                                            | 92  |
| <i>Mus musculus</i>         | FRNVGR--PPEEDAEA--                                                                | 17  |
| <i>Homo sapiens</i>         | FRNVGR--PPEEDVEA--                                                                | 17  |
| <i>Litopenaeus vannamei</i> | -----MAREGCVWIDKFASLFVKVLEALTVSC-SIGWSIKCSGQCQREQCREEY-----                       | 50  |
| <i>Chionoecetes opilio</i>  | HLATFSEANQIARECIWIDKFASLFVKHIEEALSVSS-CRGWSIKCSGQCQREQCQREY-----                  | 434 |
| <i>Zeugodacus cucurbita</i> | --VYDEP--SNLICNYAFNNAETFESNTSSNVLLLPQASHPPDKVKRDMCPYYQEHSMYFKAIPSDQDSVISAVKKFNT   | 301 |
| <i>Ceratititis capitata</i> | --VYDEP--NNVICNYALTNTVEFEQHTNSISLSLPQTSPLPERAKRDLCPYYEDHSMYFKAIPSEQDSIMS-TAKFNT   | 299 |
| <i>Oncorhynchus mykiss</i>  | ---SDNNMDVQHRLQWHPIMKL--SK-----VVTD-AGDLAGEGDLCHRHLVTDAMDWPPL-----                | 95  |
| <i>Danio rerio</i>          | -----MTVQ-----                                                                    | 4   |
| <i>Xenopus tropicalis</i>   | -----EAL--VE-----A-LP-AEG-SPQSAELCNRRHRAAQ-----                                   | 47  |
| <i>Gallus gallus</i>        | -----GEGPAGGPPELLCPRHRCALDPKAAA-----                                              | 117 |
| <i>Mus musculus</i>         | -----AREPGFSELLCPRHRCALDPKALPPG-----                                              | 43  |
| <i>Homo sapiens</i>         | -----APEGPFSELLCPRHRCALDPKALPPG-----                                              | 43  |
| <i>Litopenaeus vannamei</i> | -----QRKESNWWAVGGSGKSRKSS-----PLLGL-SCGSPGLQWTPEL--PYSPSH                         | 95  |
| <i>Chionoecetes opilio</i>  | -----QKENTLWSVGGGKGNRKSSI-----PILGL-SCGSPGLQWTPEL--PYSPSH                         | 479 |
| <i>Zeugodacus cucurbita</i> | FGLSEIHDDYLYGKRNFTQGEN-----SLQKKVL-----YSPRKVTNYGSHHHIYTGPNCGTN                   | 356 |
| <i>Ceratititis capitata</i> | YGLSEIHDDYLYGKRNAVQCEN-----GLQKKVL-----YSPRKVTNYGSHHHIYAGPNNGSN                   | 354 |
| <i>Oncorhynchus mykiss</i>  | -----LDKSLCFDILDPRKTCSTGDTNYHHHLDLTVNLARRLGELGQAS--EMLLKERGEMTRCSCQSI--LA--       | 160 |
| <i>Danio rerio</i>          | -----RQLQ-----LPEGPVLELARKFGEIGVAPVPEFL--KDGEHQHSCQSV-----                        | 47  |
| <i>Xenopus tropicalis</i>   | -----PGLGLEQLGALGLRG-----AGGPC-----                                               | 68  |
| <i>Gallus gallus</i>        | -----G-----GGWGPPGGLQLAALGLRPPA--L-GAKGPAAAPCLGP--PA--                            | 156 |
| <i>Mus musculus</i>         | -----LAL-----RTWGPVAGLEAQLAALGLGQAPAGPGI-KTAGGGCCPCPCP--PQPPPP                    | 92  |
| <i>Homo sapiens</i>         | -----LAL-----RTWGPAAGLEAQLAALGLGQAPAGPV-KTVGGGCCPCPCP--PQPPPP                     | 92  |

|                             |                                                                                     |     |
|-----------------------------|-------------------------------------------------------------------------------------|-----|
| <i>Lioptenaeus vanna</i>    | RPHSRSSSLGSSLSFSHDSLSVS-SGPRMDDSHLITGAVSHDALLFPTSKTNH-SDVSDIYNVPLGDDIY--AVPVDV----  | 167 |
| <i>Chionoecetes opilio</i>  | RPHSRSSSLGSSLSFSHDSLSVS-SGPRMDDSHLITGAVSHDALLFPTSKASHSRDVG EYIHVPLGDDIY--AVPVDV---- | 552 |
| <i>Zeugodacus cucurbita</i> | RPNRSNLSNLSRLSSSHNSLSTSSANKPDDSFITQAMSHDALLT-----REISDFYNVPIYSDIY--ALPIDMIKTD       | 426 |
| <i>Ceratitis capitata</i>   | RPNRSNLSNLSRLSSSHNSLNTSSANKPDDSFITQAMSHDALLT-----REISDFYNVPIYSDIY--ALPIDMIQTD       | 424 |
| <i>Oncorhynchus mykiss</i>  | ---SAT-----GGMGPGED---PSETDALLVLEGLDS---EEVGE---LGMGGEEFKCGVPQGEGETD                | 212 |
| <i>Danio rerio</i>          | ---LGS-----AGMRQGED---PTETSDALLVLEGLDS---EEVNG---LGINACQK-----PE                    | 89  |
| <i>Xenopus tropicalis</i>   | -----EETSDALLVLEAPEA-R-----RLBEQEE-----GE                                           | 93  |
| <i>Gallus gallus</i>        | -----AEETSDALLVLEALEP-D-----EAPSCSE-----EE                                          | 182 |
| <i>Mus musculus</i>         | QPPPPA-----AAPQAGED---PTETSDALLVLEGLS---EA-ES---LETNSCSE-----EE                     | 136 |
| <i>Homo sapiens</i>         | QPQPPA-----AAPQAGED---PTETSDALLVLEGLS---EA-ES---LETNSCSE-----EE                     | 136 |

|                                |                                                                                   |     |
|--------------------------------|-----------------------------------------------------------------------------------|-----|
| <i>Lioponaeus vanna</i>        | -VKPK---EGQILH--PKAIMHQPKKRHHRRHGNKA--SASVLNDASSKRVSSSDHVSSSRQLKESVSTRSRQHSQGQSV  | 239 |
| <i>Chionoecetes opilio</i>     | -VKPK---EGQIIH--PKAIMHHPKKRHHRRHKPTSPISVATLLHDSNSKVKSSFDVPLSTRPVKDGSVSRSRQHSQGQSV | 62  |
| <i>Zeugodactylus cucurbita</i> | KSSLVVEYDKDKLTD--YRKIN-----HLILTEENYCKHSLKSRNNRNNRKKK-----RNSDTEYNDI              | 481 |
| <i>Ceratitis capitata</i>      | KNCRLYEYKDKIKD--YKLLN-----NLLLTDDDDYKSHSLKNNRNNRKKK-----RNSETYESDV                | 477 |
| <i>Oncorhynchus mykiss</i>     | TQDDR--RGAFSSSGSLTGLMRQV-HRLAGEVRACGQVCP--SPLDLSGSAALTSSSLLSAANTTQQQV             | 279 |
| <i>Danio rerio</i>             | SQTTE---PGAFALKCFPSVLSGQAMGVSG--GLCSPTCCL-----LR---DSVNNRPQA--PAAD-----K          | 141 |
| <i>Xenopus tropicalis</i>      | AA-----GQAP-----                                                                  | 99  |
| <i>Gallus gallus</i>           | PGSPG---PAD-----PQPEP-R-----                                                      | 196 |
| <i>Mus musculus</i>            | LSSPG---RGG-----GGVGQ-RLL-----LQ-----PPGPPELPVPVFPFLQD-----L                      | 170 |
| <i>Homo sapiens</i>            | LSSPG---RGG-----GG-GQ-RLL-----LO-----PPGPPELPVPVFPFLQD-----L                      | 169 |

|                              |                                                                                  |     |
|------------------------------|----------------------------------------------------------------------------------|-----|
| <i>Liopopenaeus vannamei</i> | -A----SVSGELLRVSK--RHSVPSNIGCALSMTPKHGSPKENHEPIHMTLEEVRKSFHESDDTINCNKTHRVQQRKV   | 312 |
| <i>Chionoecetes opilio</i>   | -T----SVS-GDLLKASK--RHSVPSNIGCALSMTPKHNSSKENHEPIHMTLEEVRKSFHESDDTINCNKSNRDQESNKG | 698 |
| <i>Zeugodacrus cucurbita</i> | KYDNYKFTSNAFKLKNKKTITILNETEDYGSHTISNTQLDL-NEPQERLHMTLSEVKKKYQTIYTKTK-NRTNINN---- | 554 |
| <i>Ceratitis capitata</i>    | KCDNYKFTATNALKLNKKADTLNESEDYGLHTSAHTLLNSSAPPQERLHMTLNEVKKYQTIYTRTK-NRSSIQN----   | 553 |
| <i>Oncorhynchus mykiss</i>   | -VEASATLSGTLPSKDP--S-QTSQSLPQSRATTPKLGVMLRAASPLVV-----                           | 323 |
| <i>Danio rerio</i>           | -L-IPEVISQAEP SQETP--C-SS-----QASTPKARSSSRHLS--A-----                            | 177 |
| <i>Xenopus tropicalis</i>    | -----                                                                            | 99  |
| <i>Gallus gallus</i>         | -----GAAAAA-----RR-----A-----                                                    | 206 |
| <i>Mus musculus</i>          | -V-PGRLSRGEQQQ-----Q-----QPPP-----P-P-----                                       | 191 |
| <i>Homo sapiens</i>          | -V-PLGLRSRGEQQQQQ--QO-----QPPP-----P-P-----                                      | 193 |

|                              |                                      |                                          |                                              |                      |     |
|------------------------------|--------------------------------------|------------------------------------------|----------------------------------------------|----------------------|-----|
| <i>Liipotenaeus vannamei</i> | AHEQSKICRIIPFTSMKSKRRKDSSEGRLEDNRKKK | SKSISSNIENITLITIFGLKKGTKSSSSRLKSG-----   | SCVDAAS                                      | 386                  |     |
| <i>Chionoecetes opilio</i>   | MNEHSKICRIIPFTAMKSKRRKDSSENRLDDNRKKK | ERSSISSNIENITLITIFGLKKGTKSSGSTRLKSS----- | NCVDAAS                                      | 772                  |     |
| <i>Zeugodacrus cucurbita</i> | --ESDKT-----                         | --AFKKQSE-----                           | --YTKNDSSPSRST-----                          | --NLCSIGENVSTCEKVTTR | 597 |
| <i>Ceratitis capitata</i>    | --ESDKI-----                         | --DCVKPPI-----                           | --ELGNDSSPCSR-----                           | --NQSSNEENNSEAECTNIR | 596 |
| <i>Oncorhynchus mykiss</i>   | -----                                | --EGAAAGE--                              | --KTTREKSKRGLSKIRLSKLFRTKSSSGSSRHLDK---      | --RPSLASSTSSG        | 375 |
| <i>Danio rerio</i>           | -----                                | --ASGGEKT--                              | --LKVPKSKRGLSKIRLSKLFRTKSCSGSNLLDK---        | --RPSVTFSSISA        | 229 |
| <i>Xenopus tropicalis</i>    | -----                                | --SRRQNKASLENRLSRI                       | --FTKSCAGPPTAERELGGSG---                     | -----                | 139 |
| <i>Gallus gallus</i>         | -----                                | --VP-----                                | --GPGAAGGRKGLSVRLSRLFTKSCSGGSAFGDGGGGSRRAE-- | --LTASA              | 256 |
| <i>Mus musculus</i>          | -----                                | --PP--GPL--                              | --RPLASPSRKSGFKIRLSRLFTKSCNGGGSGGGDGTG--     | --KRPSGD--LAASA      | 243 |
| <i>Homo sapiens</i>          | -----                                | --PP--GPL--                              | --RPLASPSRKSGFKIRLSRLFTKSCNGGGSGGGDGTG--     | --KRPSGE--LAASA      | 243 |

|                             |                                                                              |     |
|-----------------------------|------------------------------------------------------------------------------|-----|
| <i>Litopenaeus vannamei</i> | QGFSEIAGNGTTTLAGSPASGPKPNNTANHTTT-V-SKNHHNQNHHSNHRHS--NGNTGLLSCLGN---HRA---- | 453 |
| <i>Chionoecetes opilio</i>  | QGFSEVAGNGTATLVCSPTSGPQHNNHTNPASNTVTNRHQNNQNHHSNPRHS--NGNTGLLSCLGN---LRA---- | 841 |
| <i>Zeugodacus cucurbita</i> | TFKS-----YNNENDKINNNINNIVLANNYS--TENQMIKVDDADLSPQVIRSEK                      | 647 |
| <i>Ceratitis capitata</i>   | TSKS-----YNNENDKINNNLNINVLANNYS--TENQMIKAPDVIDISQGVNRNEK                     | 646 |
| <i>Oncorhynchus mykiss</i>  | GSQMDVWVGSGSTST--DQDTGSKLQHSRP-----QSASFSPVAF--GPFTDTFLR---                  | 422 |
| <i>Danio rerio</i>          | GSIVDM--SGAIGG--EQLDTSSQPLTR-----QSASFAASF--TPFTGETVSLVDVISQRC               | 283 |
| <i>Xenopus tropicalis</i>   | -SLT-----DMSGRDR--ELDGRKPLRLTR-----QSASFSPVSF--SPFTGETVSLVDVISQRC            | 190 |
| <i>Gallus gallus</i>        | HSLSDG--GGARGR--GQEEGRKHRLTR-----QSASFSPVSF--SPFTGETVSLVDVISQRC              | 310 |
| <i>Mus musculus</i>         | ASLITDM--GGSAGR--ELDTGRKPLRLTR-----QSASFSPVSF--SPFTGETVSLVDVISQRC            | 297 |
| <i>Homo sapiens</i>         | ASLITDM--GGSAGR--ELDTGRKPKPLTR-----QSASFSPVSF--SPFTGETVSLVDVISQRC            | 299 |

|                              |                                                                 |                              |     |
|------------------------------|-----------------------------------------------------------------|------------------------------|-----|
| <i>Litopenaeus vannamei</i>  | -----EADDLPAAVAPAPQONSAPPSRSPAI                                 | VT-----NRALPPLPL--PSTGEE-    | 496 |
| <i>Chionoecetes opilio</i>   | -----ETDEQPVSTPSIPTQ-TVAPSRSPAI                                 | VT-----NRALPPLPL--PASPEN-    | 883 |
| <i>Zeugodacrus curcubita</i> | KTQFSNLNKQKFCNIFRIRRTQPCQCNLPGTEQNNNSRERKST-VE                  | -----KHKKVQSRALPPLPKKTES---- | 712 |
| <i>Ceratitis capitata</i>    | KTQFSNLNKQKFCNIFRIRRTQPCQCNTPPEE--RTINRERST-VE                  | -----KHKKVQSRALPPLPKKTES---- | 709 |
| <i>Oncorhynchus mykiss</i>   | -----LPRPIP-----LP-----                                         | -----GD--                    | 432 |
| <i>Danio rerio</i>           | -----RNSPHPPPPP-----PPRRSLSLDAFFRALPHSAAS-PME                   | -----NPA-                    | 322 |
| <i>Xenopus tropicalis</i>    | -----SSSTHPPPPPP-----PPRRSLSLDDIGGIQASVLVGPMGSSLSQSFPLPPPPPPHAP |                              | 244 |
| <i>Gallus gallus</i>         | -----LSSPHPPPPP-----PPRRSLSLDDISGLTPTSVLVGPMGSSLSQSFPLPPPPPPHAP |                              | 364 |
| <i>Mus musculus</i>          | -----LTSHPHPPPP-----PPRRSLSLDDISGLTPTSVLVAPMGSSLSQSFPLPPPPPPHAP |                              | 351 |
| <i>Homo sapiens</i>          | -----LTSHPHPPPP-----PPRRSLSLDDISGLTPTSVLVAPMGSSLSQSFPLPPPPPPHAP |                              | 351 |

|                             |                                   |      |                              |            |       |     |
|-----------------------------|-----------------------------------|------|------------------------------|------------|-------|-----|
| <i>Litopenaeus vannamei</i> | -----EDANSKSTQTESGSRREEEGCD       | FA   | TEKYKDGCGWYWGPLSSGAAAKVLANEP | DGSGFIVRDS | SDHYI | 564 |
| <i>Chionoecetes opilio</i>  | -----EDSPKTPDGEAAGERREEEGCD       | FA   | TEKYKDGCGWYWGPLSSGAAAKVLANEP | DGSGFIVRDS | SDHYI | 951 |
| <i>Zeugodacus curcubita</i> | -----YIEQKGNSTKKEEARLTQTSS        | TE   | KYKDYGCGWYWGPLSSGAAAKVLANEP  | DGSGFIVRDS | SDHYI | 777 |
| <i>Ceratitis capitata</i>   | -----IMTQNKGSSKKQEGERTLQTS        | TE   | KYKDYGCGWYWGPLSSGAAAKVLANEP  | DGSGFIVRDS | SDHYI | 774 |
| <i>Oncorhynchus mykiss</i>  | -----GQNQSRVDQRPMCLPLSRPDASS      | FATS | RELEKCGWYWGPMNWEDABMKKAKGP   | DGSAFIVRDS | SDPFI | 501 |
| <i>Danio rerio</i>          | -----P-ARLAPQVQMLPLRGADSSST       | FATS | RELEKCGWYWGPMNWEDABMKKRGKP   | DGSGFIVRDS | SDPFI | 388 |
| <i>Xenopus tropicalis</i>   | EPLPLRLPLRTEPCVPLVQLPCLQPLFGDPSS  | FAAS | RELEKCGWYWGPMNWEDABMKKAKGP   | DGSGFIVRDS | SDPFI | 324 |
| <i>Gallus gallus</i>        | DAFPRVVLPRTEPAPIQPAPHLQCPLYRPDSSS | FAAS | RELEKCGWYWGPMNWEDABMKKKGKP   | DGSGFIVRDS | SDPFI | 444 |
| <i>Mus musculus</i>         | DAFPRIAPIRAESLSHQPPQHLCPLYRPDSSS  | FAAS | RELEKCGWYWGPMNWEDABMKKKGKP   | DGSGFIVRDS | SDPFI | 431 |
| <i>Homo sapiens</i>         | DAFPRIAPIRAESLSHQPPQHLCPLYRPDSSS  | FAAS | RELEKCGWYWGPMNWEDABMKKKGKP   | DGSGFIVRDS | SDPFI | 433 |

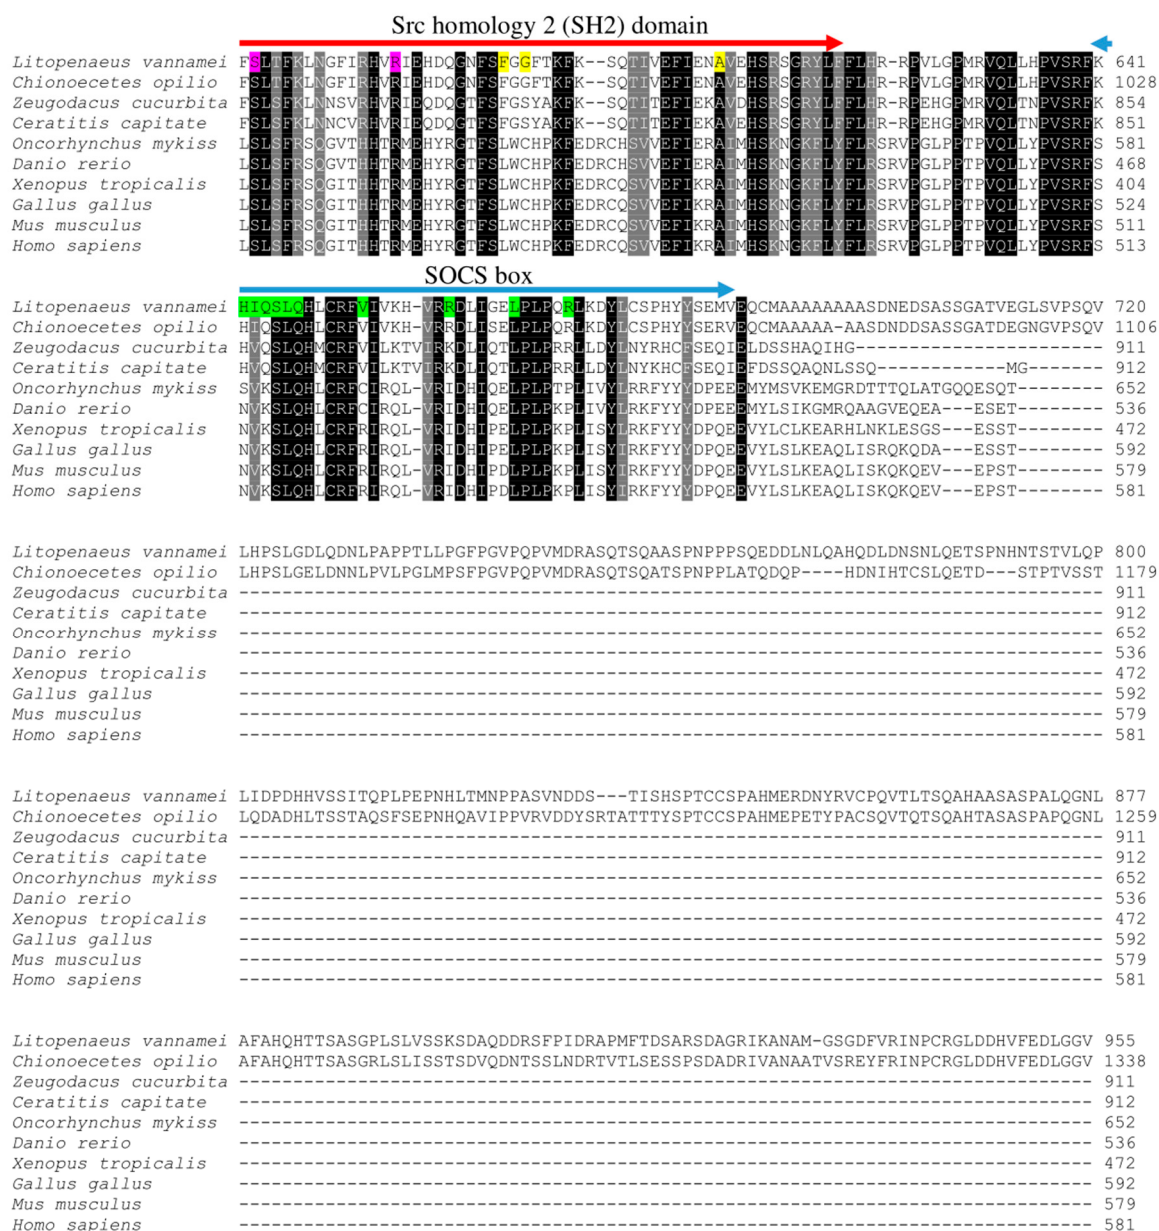

**Figure S4:** Multiple sequence alignment (MSA) of *Lvsocs7* and its counterparts. Strongly conserved and similar residues are highlighted by black and gray shading and the regions of phosphotyrosine binding motif, hydrophobic binding motif, and putative elongin B/C binding motifs are indicated in purple, yellow, and green color respectively. The species and the GenBank accession numbers used for the *Lvsocs7* MSA were as follows: *C. opilio* (KAG0725835.1), *Z. cucurbita* (JAD11819), *C. capitata* (JAC02138), *O. mykiss* (CAP17279.1), *D. rerio* (ABM68038.1), *X. tropicalis* (NP\_001121531.1), *G. gallus* (XP\_040509254.1), *M. musculus* (NP\_619598.1) and *H. sapiens* (NP\_055413.1).

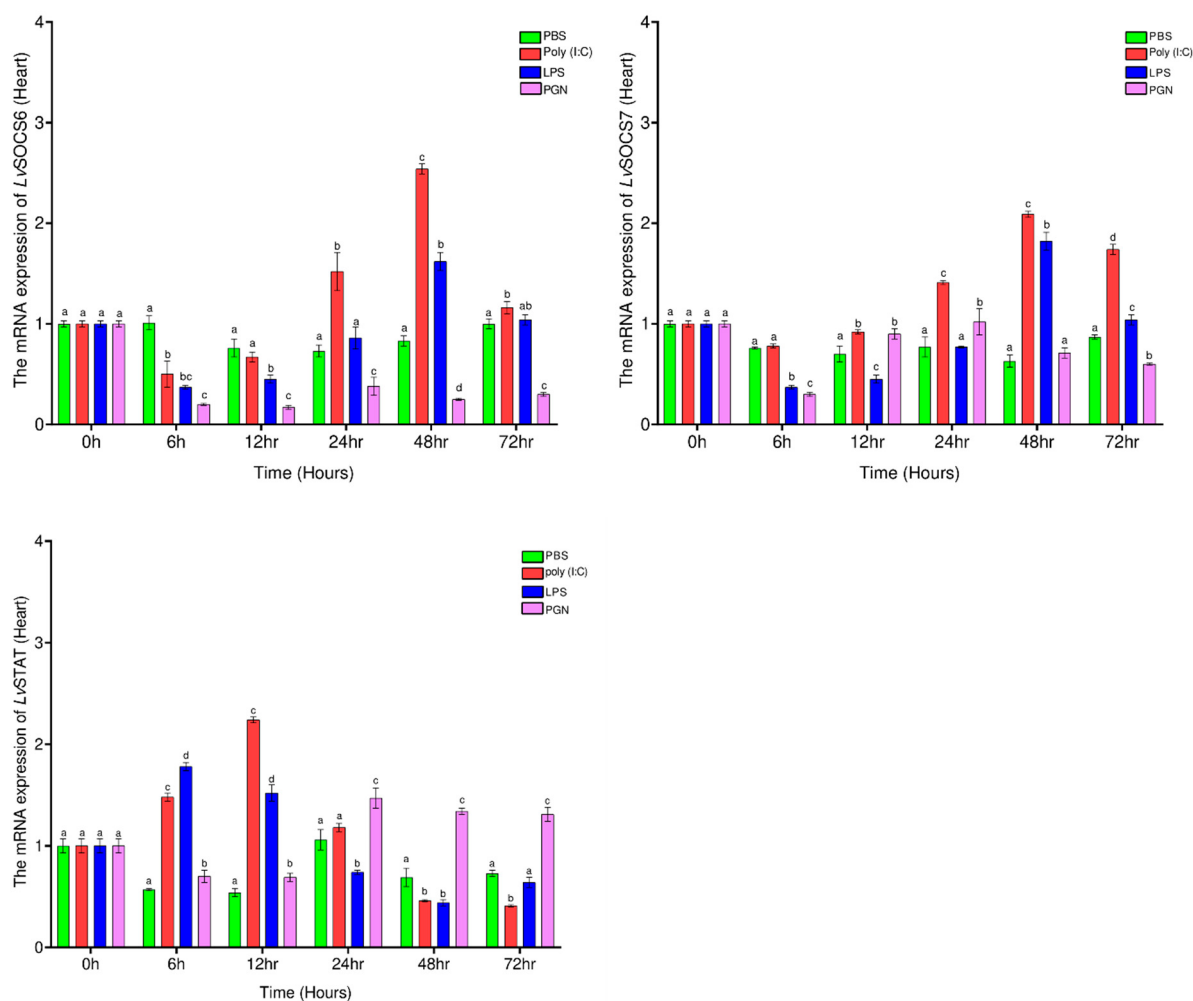

**Figure S5:** Temporal mRNA expression analysis of (A) *LvSOCS6*, (B) *LvSOCS7*, and (C) *LvSTAT* in heart tissue as determined by qPCR following stimulation of the immune response. Shrimps were challenged with LPS, poly (I:C), PGN, or phosphate-buffered saline (PBS), as a control. The expression was normalized to EF1 $\alpha$  internal control gene and analyzed using the  $2^{-\Delta\Delta CT}$  method. Results are represented as the mean  $\pm$  S.E (N= 3). Statistically significant values ( $p < 0.05$ ) are denoted with different letters.
