# Supplementary material
Source: MDPI journal article supplement (https://www.mdpi.com/2410-3888/8/8/416)
Supplement: s1 [file s1 › Table S3- The qPCR expression dynamics of immune challanged shrimps.xlsx]

## Sheet: Gills
Genes	Treatment	Time point (h)	ΔCt average	2^-(ΔΔCT) average (Fold difference)	P value	Statistically significant values		Genes	Treatment	Time point (h)	ΔCt average	2^-(ΔΔCT) average (Fold difference)	P value	Statistically significant values		Genes	Treatment	Time point (h)	ΔCt average	2^-(ΔΔCT) average (Fold difference)	P value	Statistically significant values
SOCS6 Gill	PBS	0	7.25	1.0 ± 0.06	Control	a		SOCS7 Gill	PBS	0	7.31	1.00 ± 0.02	Control	a		STAT Gill	PBS	0	8.12	1.00 ± 0.05	Control	a
SOCS6 Gill	Poly (I:C)	0	7.25	1.0 ± 0.06	1	a		SOCS7 Gill	Poly (I:C)	0	7.31	1.00 ± 0.02	1	a		STAT Gill	Poly (I:C)	0	8.12	1.00 ± 0.05	1	a
SOCS6 Gill	LPS	0	7.25	1.0 ± 0.06	1	a		SOCS7 Gill	LPS	0	7.31	1.00 ± 0.02	1	a		STAT Gill	LPS	0	8.12	1.00 ± 0.05	1	a
SOCS6 Gill	PGN	0	7.25	1.0 ± 0.06	1	a		SOCS7 Gill	PGN	0	7.31	1.00 ± 0.02	1	a		STAT Gill	PGN	0	8.12	1.00 ± 0.05	1	a
SOCS6 Gill	PBS	6	7.52	0.8 ± 0.01	Control	a		SOCS7 Gill	PBS	6	7.32	1.00 ± 0.01	Control	a		STAT Gill	PBS	6	7.99	1.09 ± 0.01	Control	a
SOCS6 Gill	Poly (I:C)	6	7.19	1.0 ± 0.02	0.011	c		SOCS7 Gill	Poly (I:C)	6	7.31	1.11 ± 0.06	0.811	a		STAT Gill	Poly (I:C)	6	7.37	1.68 ± 0.13	0	b
SOCS6 Gill	LPS	6	7.68	0.7 ± 0.02	0.322	a		SOCS7 Gill	LPS	6	6.87	1.36 ± 0.07	0	c		STAT Gill	LPS	6	6.61	2.84 ± 0.02	0	c
SOCS6 Gill	PGN	6	8.36	0.5 ± 0.11	0	b		SOCS7 Gill	PGN	6	7.04	1.21 ± 0.06	0.006	b		STAT Gill	PGN	6	7.96	1.12 ± 0.05	0.96	a
SOCS6 Gill	PBS	12	7.47	0.9 ± 0.03	Control	a		SOCS7 Gill	PBS	12	7.61	0.82 ± 0.06	Control	a		STAT Gill	PBS	12	8.35	0.85 ± 0.01	Control	a
SOCS6 Gill	Poly (I:C)	12	6.71	1.5 ± 0.13	0	c		SOCS7 Gill	Poly (I:C)	12	7.46	0.90 ± 0.03	0.183	a		STAT Gill	Poly (I:C)	12	7.48	1.56 ± 0.08	0	c
SOCS6 Gill	LPS	12	7.44	0.9 ± 0.05	0.976	a		SOCS7 Gill	LPS	12	6.51	1.74 ± 0.04	0	c		STAT Gill	LPS	12	6.87	2.38 ± 0.07	0	d
SOCS6 Gill	PGN	12	7.79	0.7 ± 0.01	0.07	b		SOCS7 Gill	PGN	12	7.24	1.05 ± 0.05	0.001	b		STAT Gill	PGN	12	7.98	1.10 ± 0.03	0.003	b
SOCS6 Gill	PBS	24	7.13	1.1 ± 0.02	Control	a		SOCS7 Gill	PBS	24	7.13	1.13 ± 0.03	Control	a		STAT Gill	PBS	24	8.04	1.06 ± 0.01	Control	a
SOCS6 Gill	Poly (I:C)	24	5.41	3.6 ± 0.08	0	d		SOCS7 Gill	Poly (I:C)	24	6.22	2.14 ± 0.03	0	c		STAT Gill	Poly (I:C)	24	8.02	1.07 ± 0.02	0.984	a
SOCS6 Gill	LPS	24	6.3	1.9 ± 0.02	0	c		SOCS7 Gill	LPS	24	6.34	1.97 ± 0.07	0	b		STAT Gill	LPS	24	7.21	1.88 ± 0.03	0	b
SOCS6 Gill	PGN	24	7.82	0.7 ± 0.13	0.001	b		SOCS7 Gill	PGN	24	7.07	1.18 ± 0.05	0.611	a		STAT Gill	PGN	24	7.06	2.08 ± 0.05	0	c
SOCS6 Gill	PBS	48	7.19	1.0 ± 0.03	Control	a		SOCS7 Gill	PBS	48	7.65	0.79 ± 0.04	Control	a		STAT Gill	PBS	48	8.58	0.73 ± 0.02	Control	a
SOCS6 Gill	Poly (I:C)	48	6.15	2.2 ± 0.19	0	c		SOCS7 Gill	Poly (I:C)	48	5.97	2.53 ± 0.12	0	c		STAT Gill	Poly (I:C)	48	7.99	1.09 ± 0.03	0	b
SOCS6 Gill	LPS	48	7.1	1.1 ± 0.04	0.859	a		SOCS7 Gill	LPS	48	6.63	1.61 ± 0.13	0	b		STAT Gill	LPS	48	7.17	1.93 ± 0.05	0	c
SOCS6 Gill	PGN	48	7.67	0.8 ± 0.05	0.024	b		SOCS7 Gill	PGN	48	7.73	0.75 ± 0.06	0.955	a		STAT Gill	PGN	48	6.89	2.35 ± 0.03	0	d
SOCS6 Gill	PBS	72	7.47	0.9 ± 0.04	Control	a		SOCS7 Gill	PBS	72	8	0.62 ± 0.02	Control	a		STAT Gill	PBS	72	8.2	0.86 ± 0.04	Control	a
SOCS6 Gill	Poly (I:C)	72	7	1.2 ± 0.03	0	d		SOCS7 Gill	Poly (I:C)	72	6.77	1.46 ± 0.04	0	c		STAT Gill	Poly (I:C)	72	7.05	2.10 ± 0.07	0	c
SOCS6 Gill	LPS	72	8.77	0.3 ± 0.01	0	c		SOCS7 Gill	LPS	72	8	0.62 ± 0.02	1	a		STAT Gill	LPS	72	7.67	1.37 ± 0.05	0.011	b
SOCS6 Gill	PGN	72	8.22	0.5 ± 0.01	0	b		SOCS7 Gill	PGN	72	8.22	0.54 ± 0.01	0.017	b		STAT Gill	PGN	72	6.85	2.41 ± 0.07	0	d
Table S3.1. The qPCR expression dynamics of LvSOCS6, LvSOCS7 and LvSTAT in gills following Poly (I:C), LPS and PGN inductions. The expression was normalized to EF1α internal control gene. Statistically significant values (p < 0.05) are denoted with different letters.

## Sheet: Heart
Genes	Treatment	Time point (h)	ΔCt average	2^-(ΔΔCT) average (Fold difference)	P value	Statistically significant values		Genes	Treatment	Time point (h)	ΔCt average	2^-(ΔΔCT) average (Fold difference)	P value	Statistically significant values		Genes	Treatment	Time point (h)	ΔCt average	2^-(ΔΔCT) average (Fold difference)	P value	Statistically significant values
SOCS6 Heart	PBS	0	7.7	1.00 ± 0.03	Control	a		SOCS7 Heart	PBS	0	7.7	1.00 ± 0.03	Control	a		STAT Heart	PBS	0	7.75	1.00 ± 0.07	Control	a
SOCS6 Heart	Poly (I:C)	0	7.7	1.00 ± 0.03	1	a		SOCS7 Heart	Poly (I:C)	0	7.7	1.00 ± 0.03	1	a		STAT Heart	Poly (I:C)	0	7.75	1.00 ± 0.07	1	a
SOCS6 Heart	LPS	0	7.7	1.00 ± 0.03	1	a		SOCS7 Heart	LPS	0	7.7	1.00 ± 0.03	1	a		STAT Heart	LPS	0	7.75	1.00 ± 0.07	1	a
SOCS6 Heart	PGN	0	7.7	1.00 ± 0.03	1	a		SOCS7 Heart	PGN	0	7.7	1.00 ± 0.03	1	a		STAT Heart	PGN	0	7.75	1.00 ± 0.07	1	a
SOCS6 Heart	PBS	6	7.7	1.01 ± 0.17	Control	a		SOCS7 Heart	PBS	6	8.1	0.76 ± 0.01	Control	a		STAT Heart	PBS	6	8.6	0.57 ± 0.01	Control	a
SOCS6 Heart	Poly (I:C)	6	8.74	0.50 ± 0.13	0.002	b		SOCS7 Heart	Poly (I:C)	6	8.06	0.78 ± 0.02	0.468	a		STAT Heart	Poly (I:C)	6	7.19	1.48 ± 0.04	0	c
SOCS6 Heart	LPS	6	9.14	0.37 ± 0.02	0	bc		SOCS7 Heart	LPS	6	9.14	0.37 ± 0.02	0	b		STAT Heart	LPS	6	6.92	1.78 ± 0.04	0	d
SOCS6 Heart	PGN	6	10.05	0.20 ± 0.01	0	c		SOCS7 Heart	PGN	6	9.44	0.30 ± 0.02	0	c		STAT Heart	PGN	6	8.32	0.69 ± 0.06	0.027	b
SOCS6 Heart	PBS	12	8.11	0.76 ± 0.06	Control	a		SOCS7 Heart	PBS	12	8.22	0.70 ± 0.08	Control	a		STAT Heart	PBS	12	8.68	0.54 ± 0.04	Control	a
SOCS6 Heart	Poly (I:C)	12	8.28	0.67 ± 0.05	0.224	a		SOCS7 Heart	Poly (I:C)	12	7.83	0.92 ± 0.02	0.004	b		STAT Heart	Poly (I:C)	12	6.59	2.24 ± 0.03	0	c
SOCS6 Heart	LPS	12	8.85	0.45 ± 0.04	0	b		SOCS7 Heart	LPS	12	8.85	0.45 ± 0.04	0.001	c		STAT Heart	LPS	12	7.15	1.51 ± 0.08	0	d
SOCS6 Heart	PGN	12	10.25	0.17 ± 0.02	0	c		SOCS7 Heart	PGN	12	7.86	0.90 ± 0.05	0.006	b		STAT Heart	PGN	12	8.33	0.69 ± 0.04	0.03	b
SOCS6 Heart	PBS	24	8.17	0.73 ± 0.06	Control	a		SOCS7 Heart	PBS	24	8.08	0.77 ± 0.10	Control	a		STAT Heart	PBS	24	7.72	1.05 ± 0.10	Control	a
SOCS6 Heart	Poly (I:C)	24	7.11	1.52 ± 0.19	0	b		SOCS7 Heart	Poly (I:C)	24	7.21	1.41 ± 0.02	0	c		STAT Heart	Poly (I:C)	24	7.52	1.17 ± 0.04	0.217	a
SOCS6 Heart	LPS	24	7.93	0.86 ± 0.11	0.592	a		SOCS7 Heart	LPS	24	8.09	0.77 ± 0.01	0.999	a		STAT Heart	LPS	24	8.19	0.74 ± 0.02	0.002	b
SOCS6 Heart	PGN	24	9.12	0.38 ± 0.09	0.037	c		SOCS7 Heart	PGN	24	7.69	1.02 ± 0.13	0.028	b		STAT Heart	PGN	24	7.24	1.47 ± 0.10	0	c
SOCS6 Heart	PBS	48	7.97	0.83 ± 0.05	Control	a		SOCS7 Heart	PBS	48	8.37	0.63 ± 0.06	Control	a		STAT Heart	PBS	48	8.33	0.69 ± 0.09	Control	a
SOCS6 Heart	Poly (I:C)	48	6.36	2.54 ± 0.05	0	c		SOCS7 Heart	Poly (I:C)	48	6.64	2.09 ± 0.03	0	c		STAT Heart	Poly (I:C)	48	8.87	0.46 ± 0.01	0.001	b
SOCS6 Heart	LPS	48	7.01	1.62 ± 0.09	0	b		SOCS7 Heart	LPS	48	6.84	1.82 ± 0.09	0	b		STAT Heart	LPS	48	8.93	0.44 ± 0.03	0.001	b
SOCS6 Heart	PGN	48	9.73	0.25 ± 0.01	0	d		SOCS7 Heart	PGN	48	8.21	0.71 ± 0.05	0.52	a		STAT Heart	PGN	48	7.38	1.33 ± 0.03	0	c
SOCS6 Heart	PBS	72	7.71	1.00 ± 0.05	Control	a		SOCS7 Heart	PBS	72	7.91	0.87 ± 0.02	Control	a		STAT Heart	PBS	72	8.25	0.73 ± 0.03	Control	a
SOCS6 Heart	Poly (I:C)	72	7.5	1.16 ± 0.06	0.023	b		SOCS7 Heart	Poly (I:C)	72	6.91	1.74 ± 0.05	0	d		STAT Heart	Poly (I:C)	72	9.03	0.41 ± 0.01	0	b
SOCS6 Heart	LPS	72	7.65	1.04 ± 0.05	0.776	ab		SOCS7 Heart	LPS	72	7.65	1.04 ± 0.05	0.002	c		STAT Heart	LPS	72	8.4	0.64 ± 0.05	0.147	a
SOCS6 Heart	PGN	72	9.45	0.30 ± 0.02	0	c		SOCS7 Heart	PGN	72	8.45	0.60 ± 0.01	0	b		STAT Heart	PGN	72	7.4	1.31 ± 0.07	0	c
Table S3.2. The qPCR expression dynamics of LvSOCS6, LvSOCS7 and LvSTAT in heart following Poly (I:C), LPS and PGN inductions. The expression was normalized to EF1α internal control gene. Statistically significant values (p < 0.05) are denoted with different letters.

## Sheet: Muscle
Genes	Treatment	Time point (h)	ΔCt average	2^-(ΔΔCT) average (Fold difference)	P value	Statistically significant values		Genes	Treatment	Time point (h)	ΔCt average	2^-(ΔΔCT) average (Fold difference)	P value	Statistically significant values
SOCS6 Muscle	PBS	0	8.55	1.00 ± 0.05	Control	a		STAT Muscle	PBS	0	8.06	1.00 ± 0.07	Control	a
SOCS6 Muscle	Poly (I:C)	0	8.55	1.00 ± 0.05	1	a		STAT Muscle	Poly (I:C)	0	8.06	1.00 ± 0.07	1	a
SOCS6 Muscle	LPS	0	8.55	1.00 ± 0.05	1	a		STAT Muscle	LPS	0	8.06	1.00 ± 0.07	1	a
SOCS6 Muscle	PGN	0	8.55	1.00 ± 0.05	1	a		STAT Muscle	PGN	0	8.06	1.00 ± 0.07	1	a
SOCS6 Muscle	PBS	6	8.67	0.92 ± 0.02	Control	a		STAT Muscle	PBS	6	8.28	0.86 ± 0.03	Control	a
SOCS6 Muscle	Poly (I:C)	6	8.73	0.88 ± 0.11	0.953	ab		STAT Muscle	Poly (I:C)	6	7.52	1.47 ± 0.03	0	b
SOCS6 Muscle	LPS	6	9.1	0.69 ± 0.13	0.045	b		STAT Muscle	LPS	6	6.79	2.39 ± 0.10	0	c
SOCS6 Muscle	PGN	6	10.4	0.28 ± 0.02	0	c		STAT Muscle	PGN	6	7.34	1.63 ± 0.02	0	d
SOCS6 Muscle	PBS	12	8.77	0.86 ± 0.06	Control	a		STAT Muscle	PBS	12	7.93	1.08 ± 0.01	Control	a
SOCS6 Muscle	Poly (I:C)	12	7.55	2.11 ± 0.14	0	b		STAT Muscle	Poly (I:C)	12	7.36	1.64 ± 0.04	0	b
SOCS6 Muscle	LPS	12	7.67	1.84 ± 0.14	0.001	b		STAT Muscle	LPS	12	7.81	1.18 ± 0.06	0.359	a
SOCS6 Muscle	PGN	12	9.45	0.54 ± 0.03	0.0206	c		STAT Muscle	PGN	12	6.19	3.62 ± 0.11	0	c
SOCS6 Muscle	PBS	24	8.77	0.85 ± 0.04	Control	a		STAT Muscle	PBS	24	8.39	0.8 ± 0.02	Control	a
SOCS6 Muscle	Poly (I:C)	24	6.77	3.42 ± 0.17	0	c		STAT Muscle	Poly (I:C)	24	8.87	0.58 ± 0.02	0.221	ab
SOCS6 Muscle	LPS	24	7.93	1.54 ± 0.21	0.001	d		STAT Muscle	LPS	24	9.92	0.27 ± 0.02	0.017	b
SOCS6 Muscle	PGN	24	9.65	0.47 ± 0.05	0.035	b		STAT Muscle	PGN	24	6.82	2.35 ± 0.11	0	c
SOCS6 Muscle	PBS	48	8.74	0.87 ± 0.05	Control	a		STAT Muscle	PBS	48	8.59	0.68 ± 0.01	Control	a
SOCS6 Muscle	Poly (I:C)	48	8.99	0.73 ± 0.05	0.315	ab		STAT Muscle	Poly (I:C)	48	8.99	0.53 ± 0.02	0	b
SOCS6 Muscle	LPS	48	8.79	0.85 ± 0.11	0.99	a		STAT Muscle	LPS	48	9.83	0.29 ± 0.04	0	c
SOCS6 Muscle	PGN	48	9.31	0.60 ± 0.14	0.029	b		STAT Muscle	PGN	48	6.28	3.39 ± 0.01	0	d
SOCS6 Muscle	PBS	72	9.19	0.64 ± 0.03	Control	a		STAT Muscle	PBS	72	8.01	1.02 ± 0.04	Control	a
SOCS6 Muscle	Poly (I:C)	72	8.78	0.85 ± 0.05	0.008	c		STAT Muscle	Poly (I:C)	72	7.48	1.51 ± 0.03	0.012	b
SOCS6 Muscle	LPS	72	8.85	0.81 ± 0.10	0.028	bc		STAT Muscle	LPS	72	6.95	2.13 ± 0.10	0	c
SOCS6 Muscle	PGN	72	9.1	0.68 ± 0.01	0.793	ab		STAT Muscle	PGN	72	6.18	3.65 ± 0.25	0	d
Table S3.3.The qPCR expression dynamics of LvSOCS6 and LvSTAT in muscle following Poly (I:C), LPS and PGN inductions. The expression was normalized to EF1α internal control gene. Statistically significant values (p < 0.05) are denoted with different letters.

## Sheet: Stomach
Genes	Treatment	Time point (h)	ΔCt average	2^-(ΔΔCT) average (Fold difference)	P value	Statistically significant values		Genes	Treatment	Time point (h)	ΔCt average	2^-(ΔΔCT) average (Fold difference)	P value	Statistically significant values
SOCS7 Stomach	PBS	0	7.31	1.00 ± 0.02	Control	a		STAT Stomach	PBS	0	9.47	1.00 ± 0.06	Control	a
SOCS7 Stomach	Poly (I:C)	0	7.31	1.00 ± 0.02	1	a		STAT Stomach	Poly (I:C)	0	9.47	1.00 ± 0.06	1	a
SOCS7 Stomach	LPS	0	7.31	1.00 ± 0.02	1	a		STAT Stomach	LPS	0	9.47	1.00 ± 0.06	1	a
SOCS7 Stomach	PGN	0	7.31	1.00 ± 0.02	1	a		STAT Stomach	PGN	0	9.47	1.00 ± 0.06	1	a
SOCS7 Stomach	PBS	6	7.7	0.76 ± 0.02	Control	a		STAT Stomach	PBS	6	9.42	1.04 ± 0.07	Control	a
SOCS7 Stomach	Poly (I:C)	6	9.24	0.26 ± 0.03	0	b		STAT Stomach	Poly (I:C)	6	8.81	1.58 ± 0.02	0	c
SOCS7 Stomach	LPS	6	9.76	0.18 ± 0.02	0	c		STAT Stomach	LPS	6	8.8	1.59 ± 0.03	0	c
SOCS7 Stomach	PGN	6	10.07	0.15 ± 0.02	0	c		STAT Stomach	PGN	6	9.84	0.78 ± 0.07	0	b
SOCS7 Stomach	PBS	12	7.77	0.73 ± 0.04	Control	a		STAT Stomach	PBS	12	9.33	1.10 ± 0.01	Control	a
SOCS7 Stomach	Poly (I:C)	12	7.77	0.73 ± 0.01	0.999	a		STAT Stomach	Poly (I:C)	12	8.37	2.14 ± 0.10	0.004	b
SOCS7 Stomach	LPS	12	9.11	0.29 ± 0.01	0	c		STAT Stomach	LPS	12	8.63	1.80 ± 0.18	0.036	b
SOCS7 Stomach	PGN	12	8.71	0.38 ± 0.03	0	b		STAT Stomach	PGN	12	8.03	2.93 ± 0.08	0	c
SOCS7 Stomach	PBS	24	7.96	0.64 ± 0.03	Control	a		STAT Stomach	PBS	24	9.35	1.09 ± 0.06	Control	a
SOCS7 Stomach	Poly (I:C)	24	6.81	1.42 ± 0.07	0	c		STAT Stomach	Poly (I:C)	24	9.31	1.12 ± 0.05	0.987	a
SOCS7 Stomach	LPS	24	7.93	0.65 ± 0.01	0.984	a		STAT Stomach	LPS	24	8.49	1.98 ± 0.10	0	b
SOCS7 Stomach	PGN	24	8.82	0.35 ± 0.05	0	b		STAT Stomach	PGN	24	8.29	2.32 ± 0.07	0	c
SOCS7 Stomach	PBS	48	7.79	0.72 ± 0.01	Control	a		STAT Stomach	PBS	48	9.52	0.96 ± 0.01	Control	a
SOCS7 Stomach	Poly (I:C)	48	5.88	2.70 ± 0.09	0	c		STAT Stomach	Poly (I:C)	48	9.18	1.23 ± 0.10	0.0101	b
SOCS7 Stomach	LPS	48	7.03	1.22 ± 0.15	0.001	b		STAT Stomach	LPS	48	9.53	0.97 ± 0.10	1	a
SOCS7 Stomach	PGN	48	8.83	0.52 ± 0.03	0.0419	d		STAT Stomach	PGN	48	7.77	3.19 ± 0.09	0	c
SOCS7 Stomach	PBS	72	7.59	0.83 ± 0.04	Control	a		STAT Stomach	PBS	72	9.65	0.89 ± 0.05	Control	a
SOCS7 Stomach	Poly (I:C)	72	7.58	0.83 ± 0.04	0.998	a		STAT Stomach	Poly (I:C)	72	7.55	3.80 ± 0.17	0	c
SOCS7 Stomach	LPS	72	7.3	1.01 ± 0.08	0.007	b		STAT Stomach	LPS	72	8.7	1.70 ± 0.02	0	b
SOCS7 Stomach	PGN	72	9.82	0.18 ± 0.01	0	c		STAT Stomach	PGN	72	7.52	3.88 ± 0.11	0	c
Table S3.4. The qPCR expression dynamics of LvSOCS7 and LvSTAT in stomach following Poly (I:C), LPS and PGN inductions. The expression was normalized to EF1α internal control gene. Statistically significant values (p < 0.05) are denoted with different letters.
